# Supplementary material for: Biological classification with RNA-seq data: Can alternatively spliced transcript expression enhance machine learning classifiers?
Source: PubMed Central journal article supplement — RNA. 2018 Sep;24(9):1119–32. doi: 10.1261/rna.062802.117 (PMC6097660; doi:10.1261/rna.062802.117), 2018-09
Supplement: supp_062802.117_Supplemental_Figures.pdf [file supp_062802.117_Supplemental_Figures.pdf]

## Supplementary Figures

**Figures S1-S3. Distribution of Classes for each Dataset.** Y-axis is the number of samples. The X-axis lists the classes used for binary and multiclass (MC) classifications. Colors group classes of similar type. Each figure depicts a different dataset for RBM (S9), NCBI (S10), TCGA (S11)

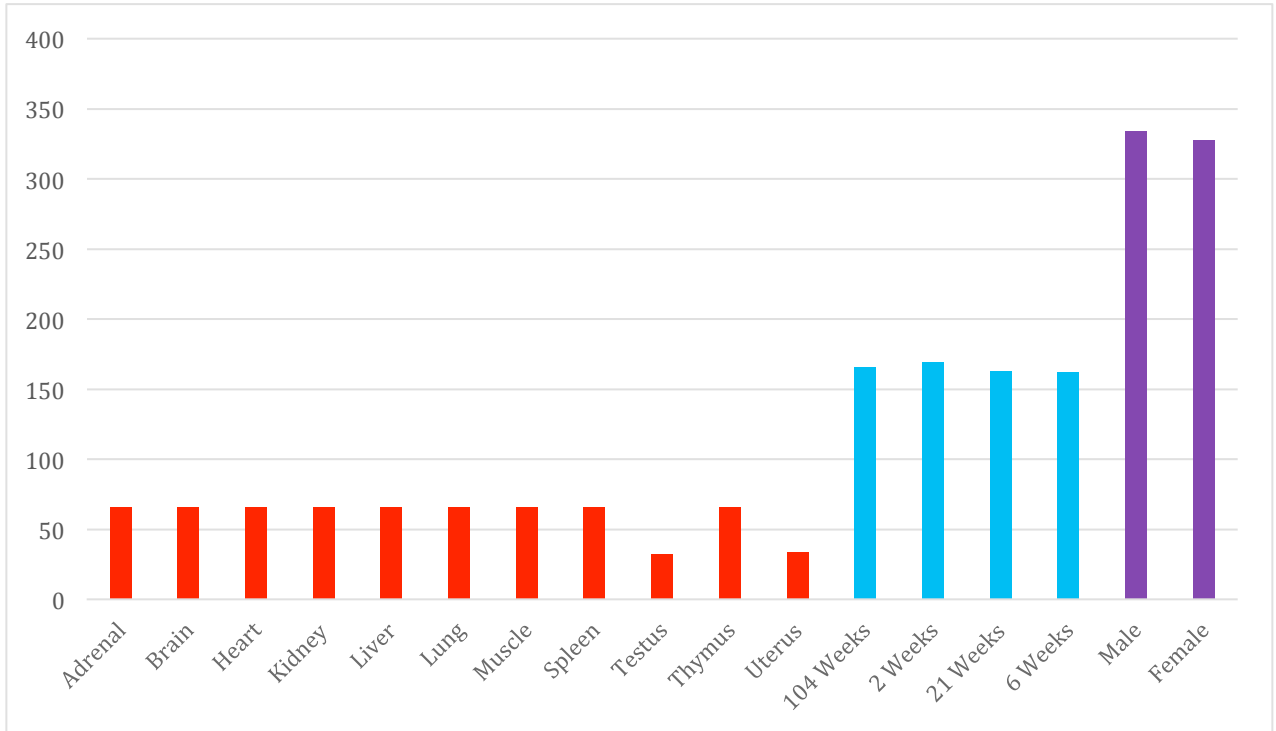

**Figure S1- RBM**

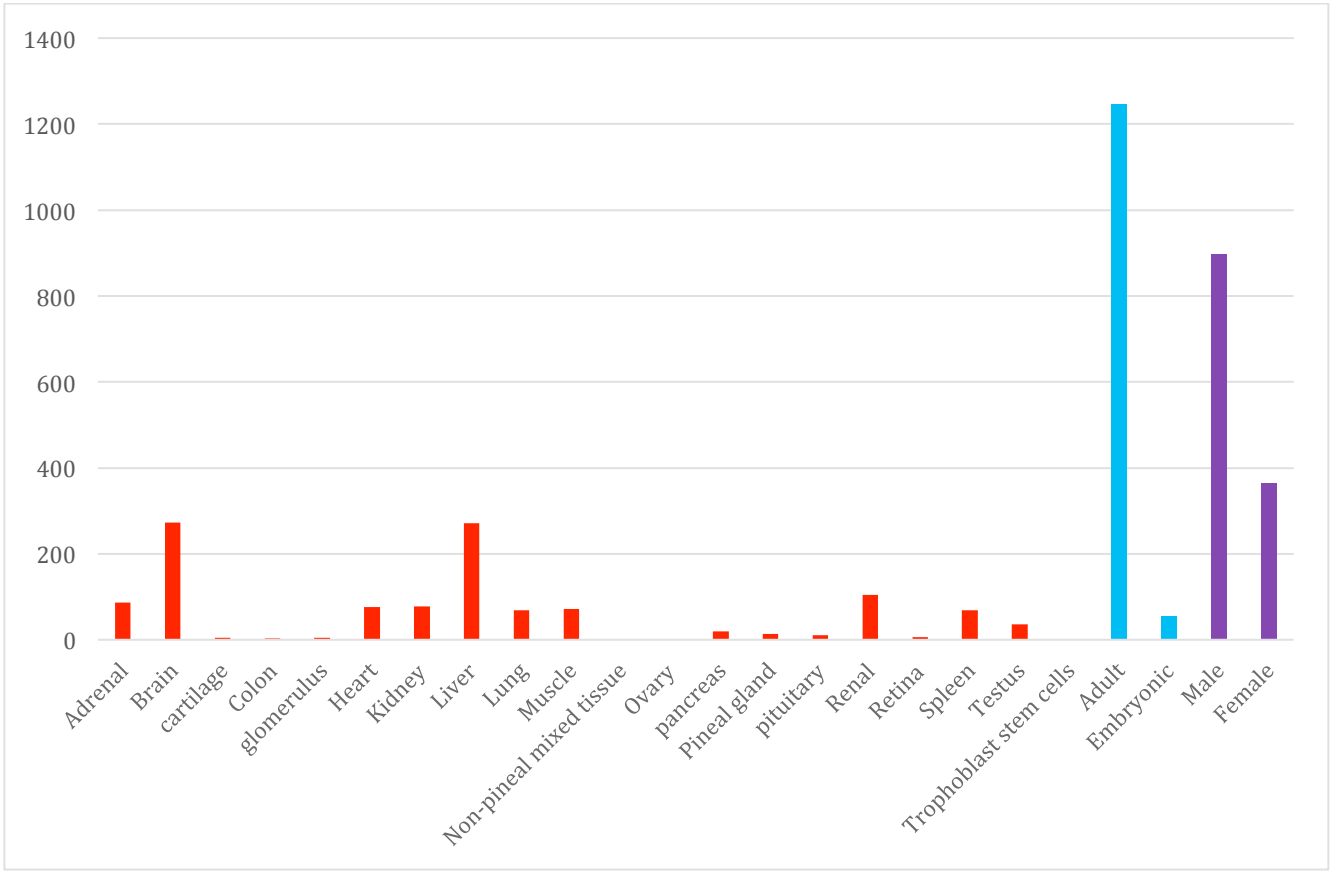

**Figure S2-NCBI**

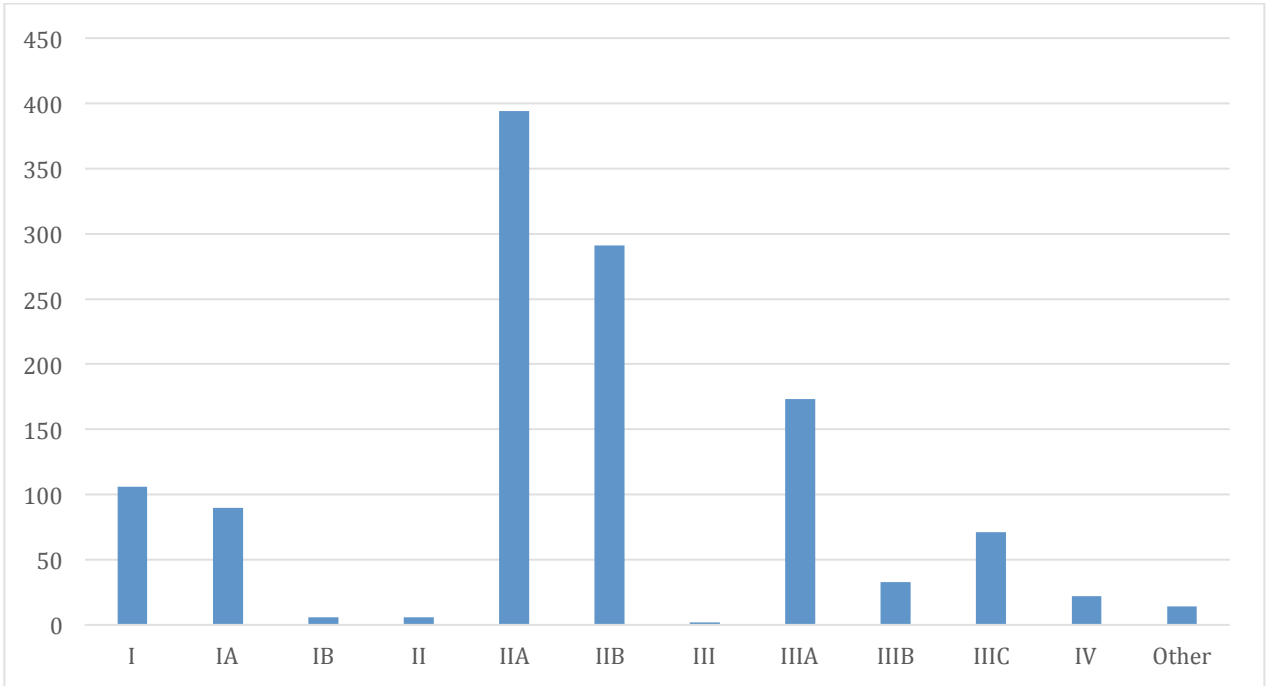

**Figure S3- TCGA**

**Figures S4-S7 Comparing the Number of Features Selected During Feature Selection Protocol for Gene vs Isoform Based Classification.** The Y-axis is the number of features. The X-axis lists the classes used for binary and multiclass (MC) classifications. Each figure depicts an individual dataset: RBM (S4), NCBI (S5), TCGA- $\log_2$  Normalized (S6), and TCGA-Raw Count (S7).

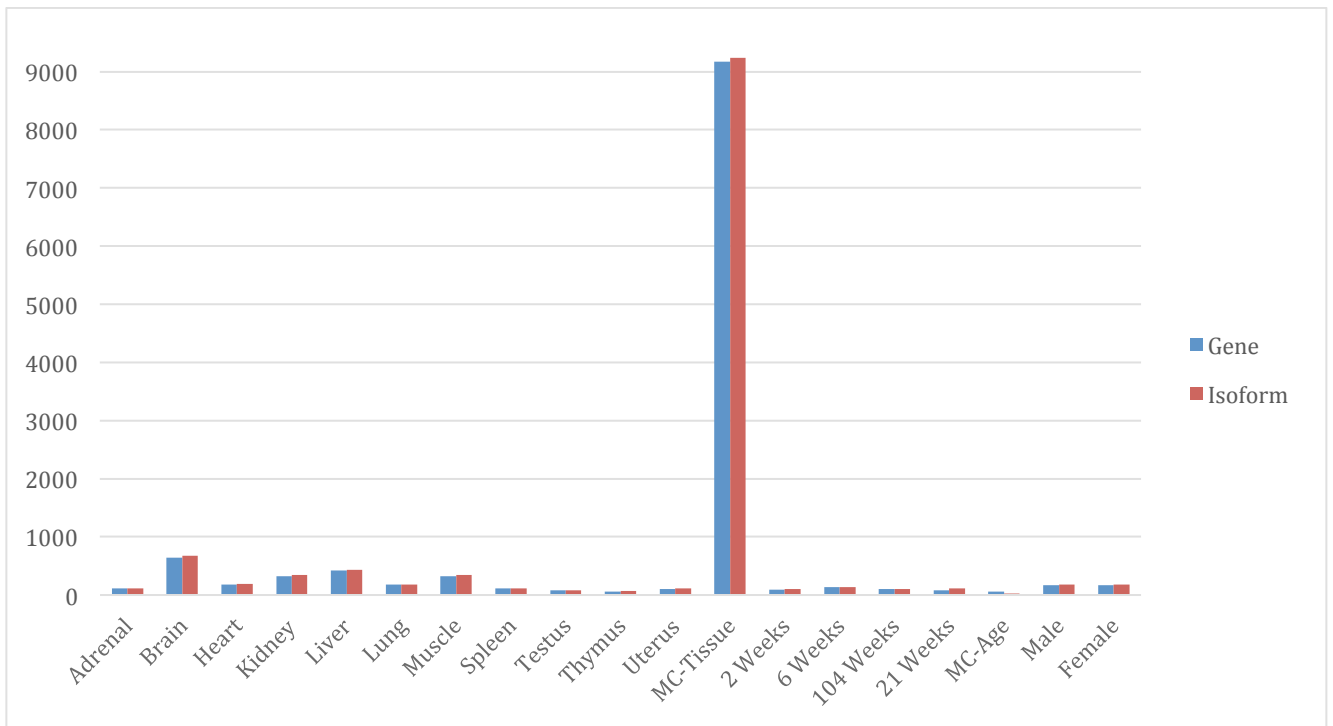

**Figure S4-RBM**

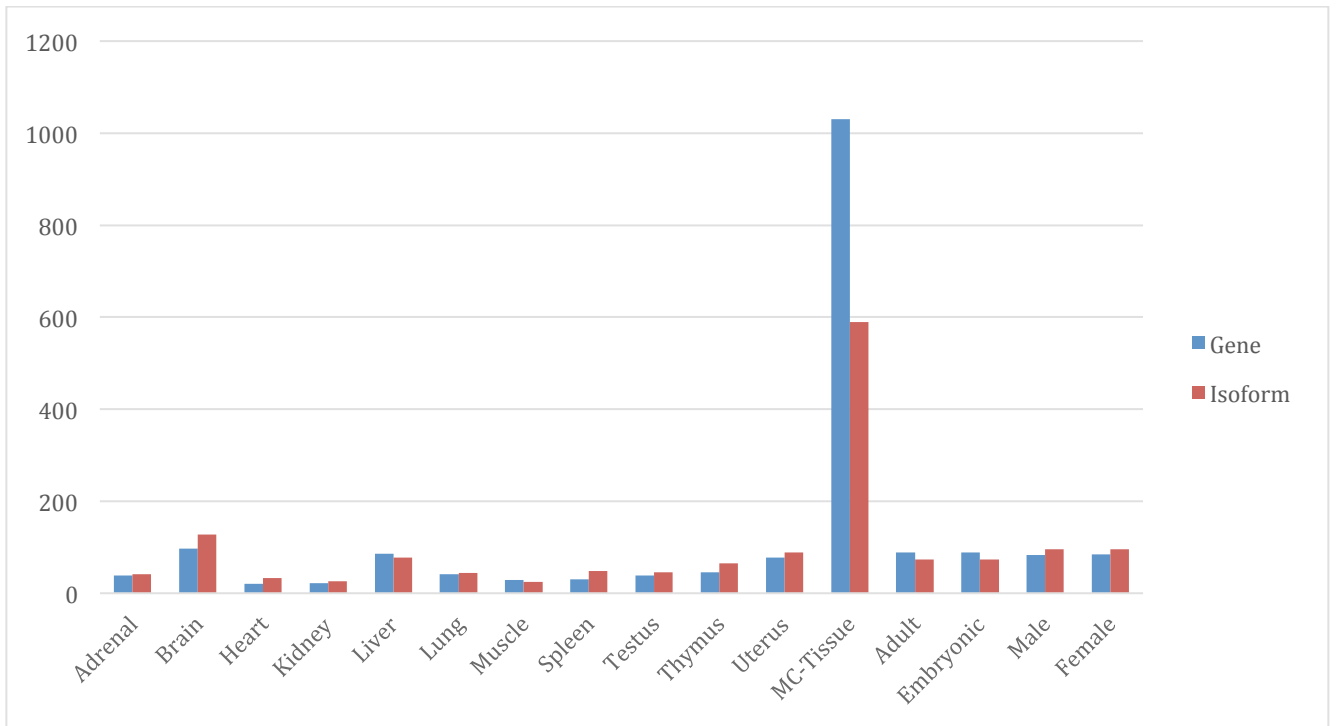

**Figure S5-NCBI**

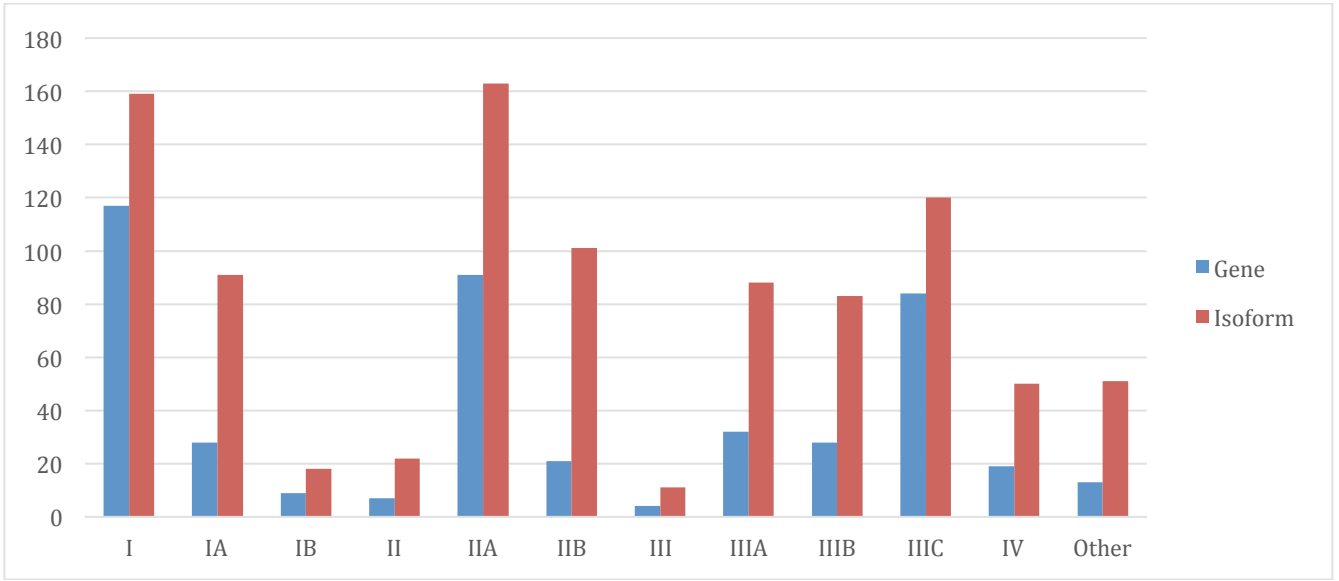

**Figure S6- TCGA Log<sub>2</sub> Normalized**

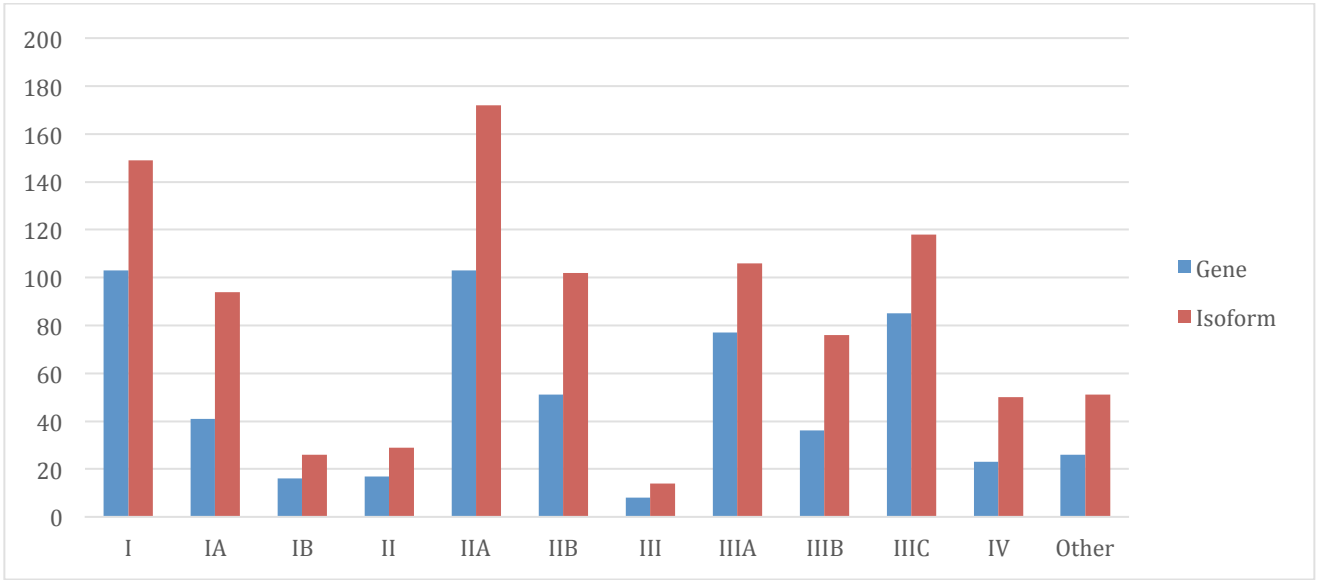

**Figure S7 – TCGA Raw Counts**

**Figures S8–S11 Comparing the Number of Features Selected Post-Feature Selection across Normalization Techniques for Gene Features.** The Y-axis is the number of features. The X-axis lists the classes used for binary and multiclass (MC) classifications. Each figure depicts a different dataset for RBM (S8), NCBI (S9), TCGA-log<sub>2</sub> Normalized (S10), and TCGA-Raw Count (S11).

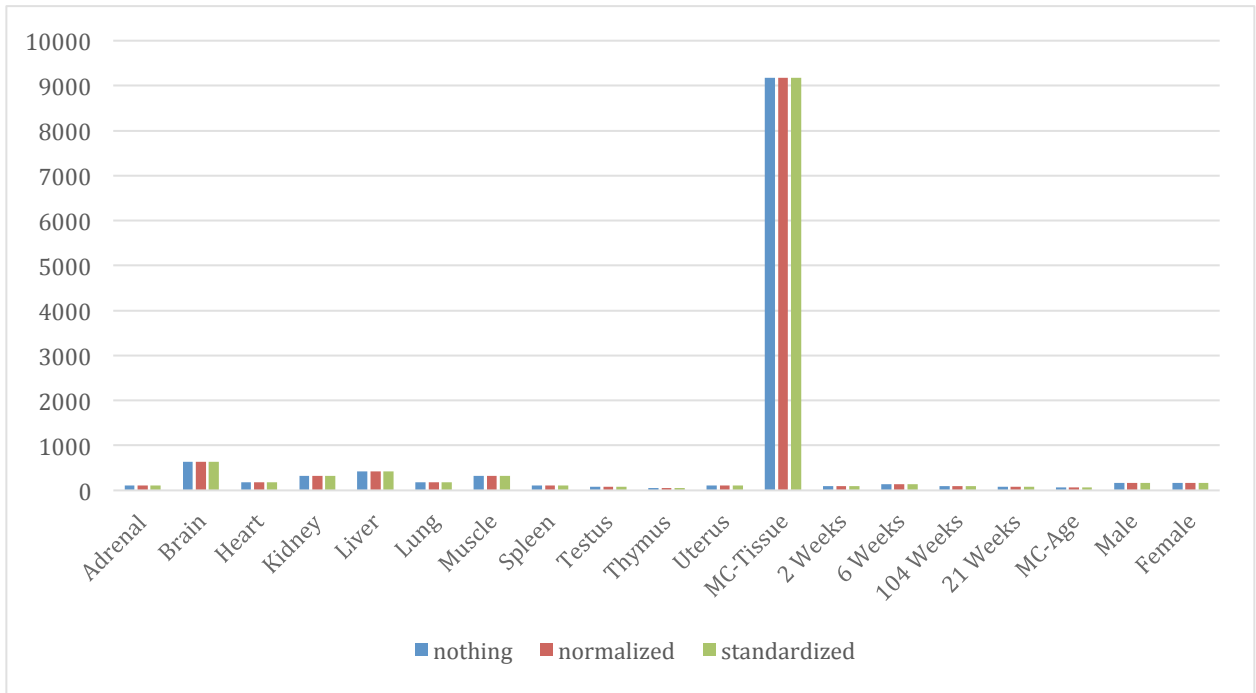

**Figure S8 – RBM**



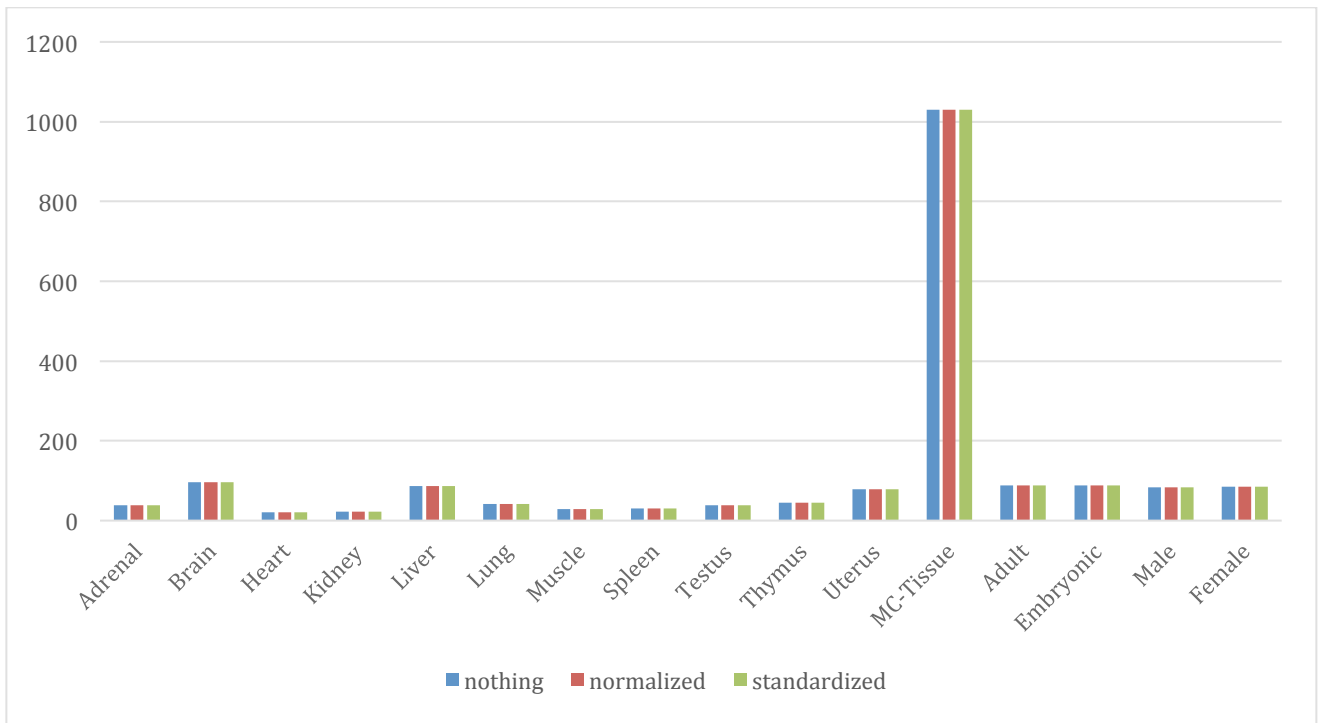

**Figure S9-NCBI**

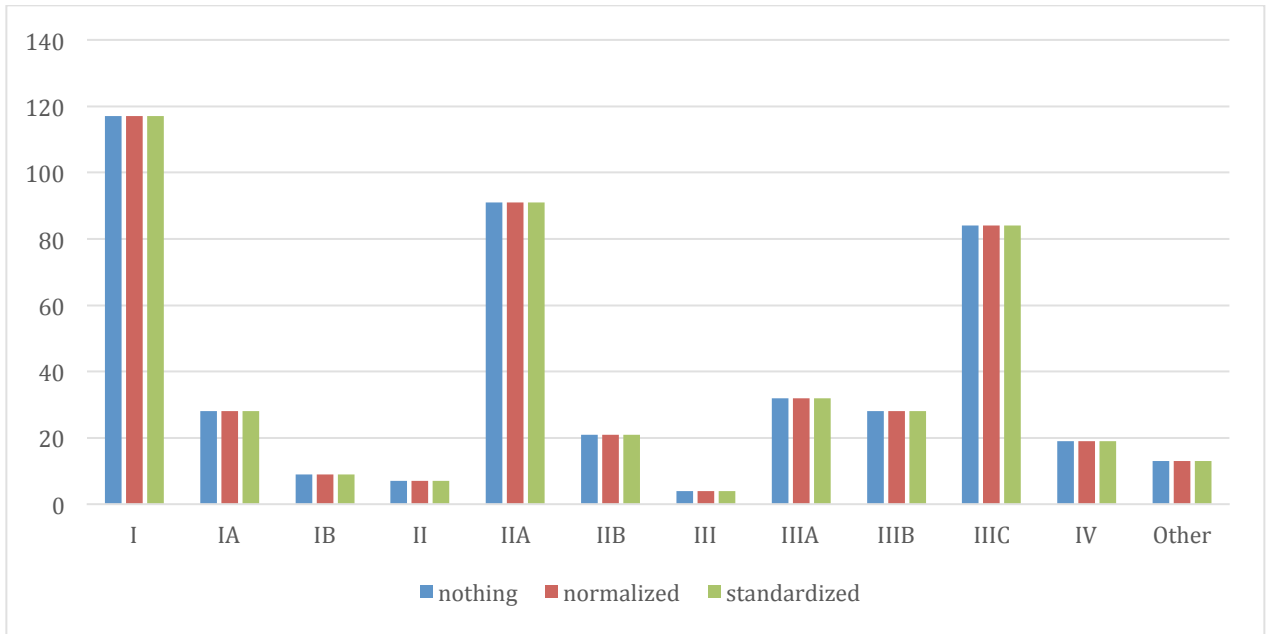

**Figure S10-TCGA Log<sub>2</sub> Normalization**

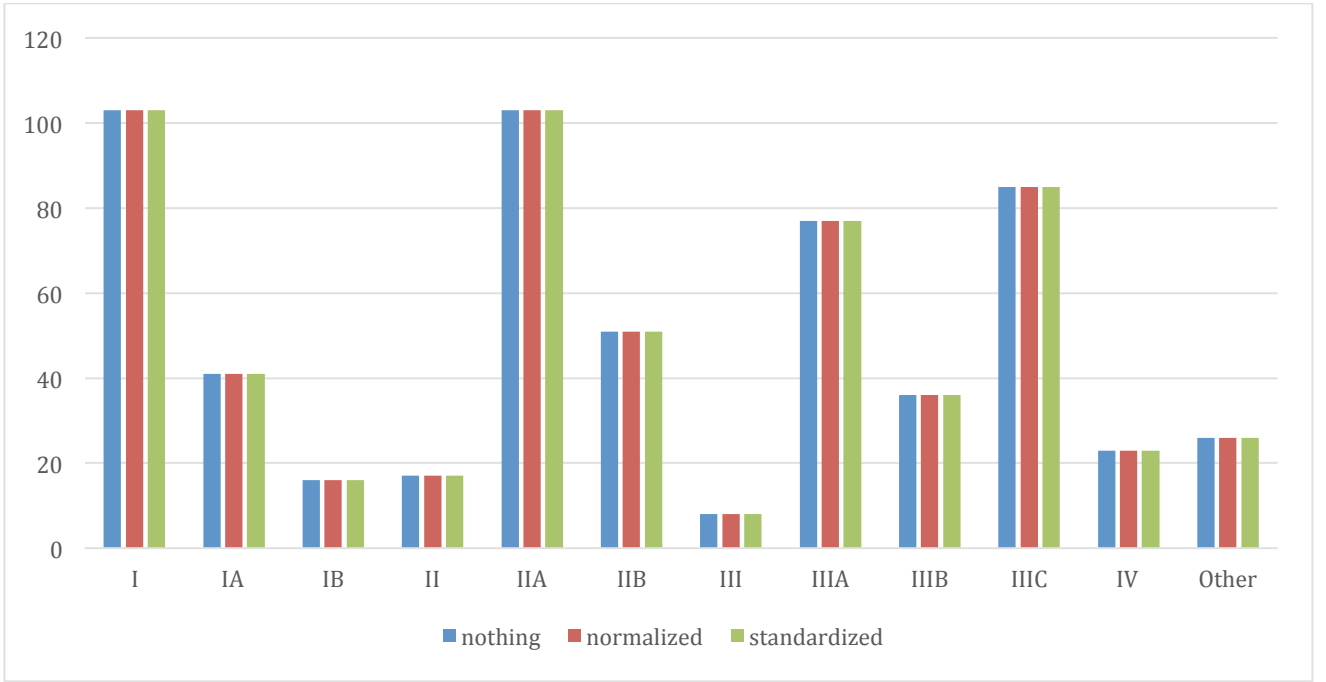

**Figure S11-TCGA Raw Count**

**Figures S12-S13. Heat Map representation of  $f$ -measure standard deviation across the 10-Fold Cross Validation across machine learning methods, classes, datasets, and normalization techniques.** For the majority of classification tasks, the standard deviation was less than 1% for both Gene (S12) and Transcript (S13). The top x-axis represents normalization techniques including Nothing (no normalization), Standardized, and Normalized. The bottom x-axis represents the machine learning techniques (DT = Decision Table, J48 = J48 Decision Tree, LR = Linear Regression, NB = Naïve Bayes, RF = Random Forest, SVM = Support Vector Machine). The y-axis represents the classes where MC stands for multiclass. Datasets for each panel are (A) RBM, (B) NCBI, (C) TCGA – log<sub>2</sub> normalized counts, (D) TCGA – raw counts.

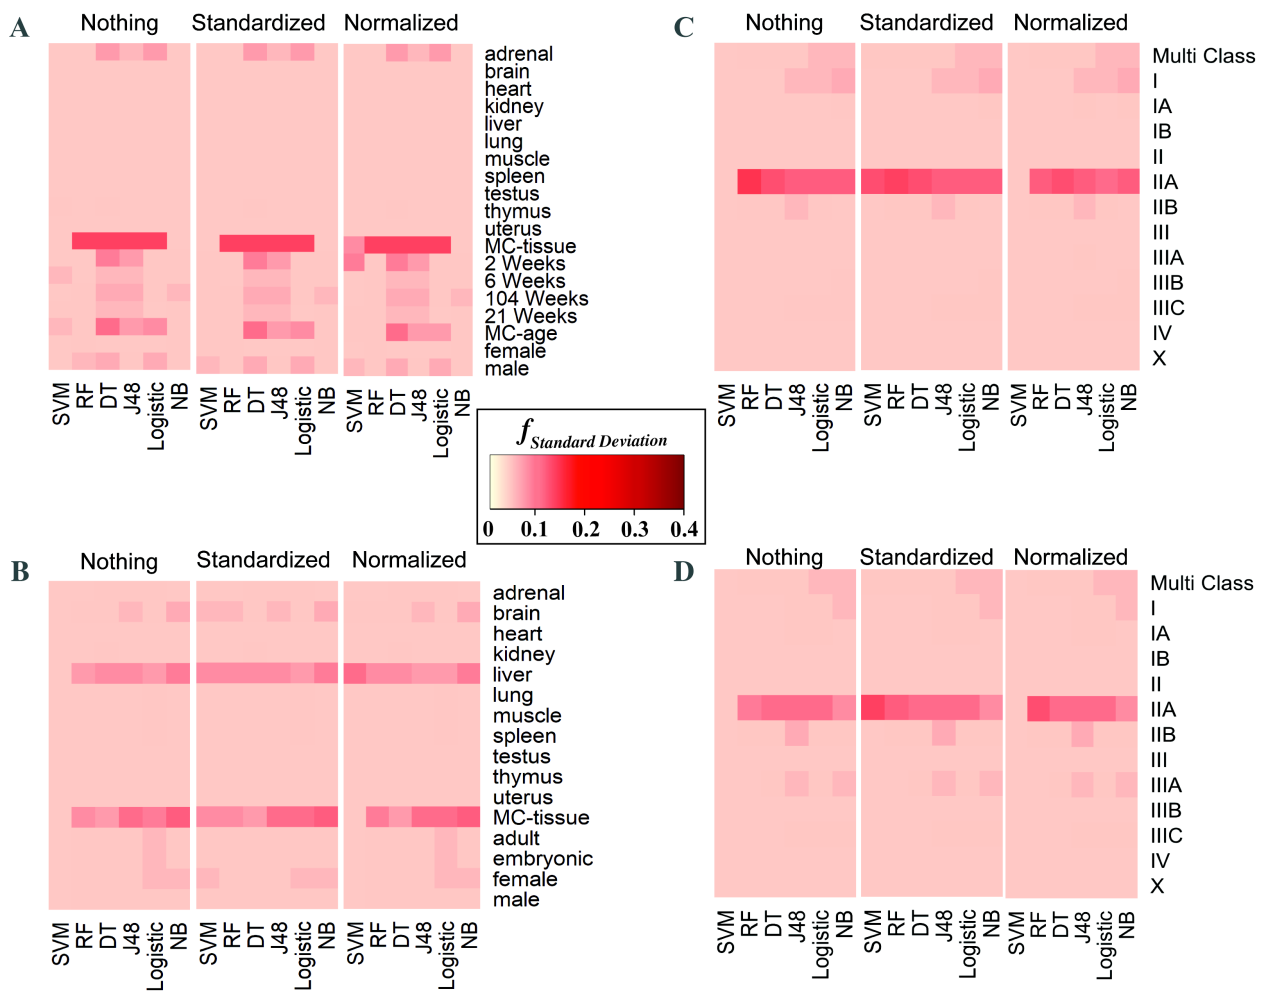

**Figure S12-Gene**

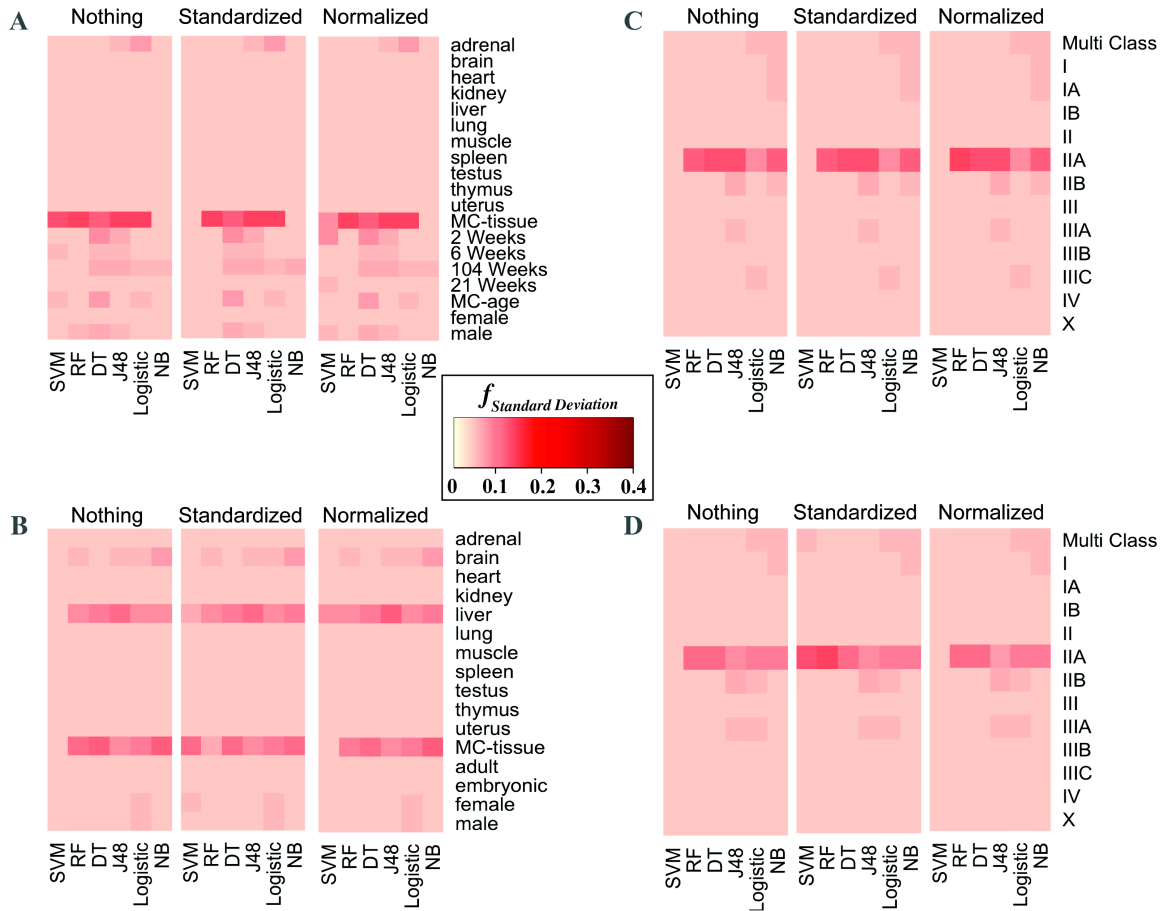

**Figure S13- Transcript**

**Supplementary Tables**

**Table S1- List of all NCBI SRA Project IDs for NCBI Dataset**

| <b>Accession Number</b> | <b>Number of Samples</b> |
|-------------------------|--------------------------|
| SRP037986               | 662                      |
| SRP023266               | 144                      |
| SRP041131               | 125                      |
| SRP039021               | 116                      |
| SRP028932               | 48                       |
| SRP016501               | 27                       |
| SRP036442               | 24                       |
| SRP041119               | 16                       |
| SRP045777               | 16                       |
| SRP021090               | 14                       |
| SRP028515               | 12                       |
| SRP029760               | 12                       |
| SRP041920               | 12                       |
| SRP055430               | 12                       |
| SRP042370               | 10                       |
| SRP021119               | 8                        |
| SRP046247               | 8                        |
| SRP018407               | 6                        |
| SRP044684               | 6                        |
| SRP046248               | 6                        |
| SRP035358               | 4                        |
| SRP041741               | 4                        |
| SRP045117               | 4                        |
| SRP051483               | 4                        |
| SRP009272               | 2                        |
| SRP013262               | 2                        |
| SRP017140               | 2                        |
| SRP029980               | 2                        |
| SRP047494               | 1                        |

**Table S2. Initial number of features, and the average number of features after feature selection procedure across different classification problems**

|                                            | <b>Initial</b> |                   | <b>After Feature Selection</b> |                   |
|--------------------------------------------|----------------|-------------------|--------------------------------|-------------------|
|                                            | <b>Gene</b>    | <b>Transcript</b> | <b>Gene</b>                    | <b>Transcript</b> |
| <b>RBM</b>                                 | 25,538         | 29,130            | 659                            | 671               |
| <b>NCBI</b>                                | 10,711         | 17,506            | 119                            | 97                |
| <b>TCGA-Raw</b>                            | 20,524         | 73,592            | 49                             | 82                |
| <b>TCGA-log<sub>2</sub><br/>Normalized</b> | 20,524         | 73,592            | 38                             | 80                |

**Table S3- Number of Features Selected: Binary classification (average) and Multiclass classification**

|                                                     | <b>Binary-Average</b> |                   | <b>Multiclass</b> |                   |
|-----------------------------------------------------|-----------------------|-------------------|-------------------|-------------------|
|                                                     | <b>Gene</b>           | <b>Transcript</b> | <b>Gene</b>       | <b>Transcript</b> |
| <b>RBM-Tissue</b>                                   | 230                   | 242               | 9173              | 9237              |
| <b>RBM-Age</b>                                      | 102                   | 114               | 60                | 27                |
| <b>NCBI-Tissue</b>                                  | 48                    | 97                | 1030              | 589               |
| <b>TCGA-Raw-Cancer Stage</b>                        | 38                    | 80                | 20                | 73                |
| <b>TCGA-log<sub>2</sub> Normalized-Cancer Stage</b> | 49                    | 82                | 20                | 73                |
